# Supplementary material
Source: PubMed Central journal article supplement (PMC4007110)
Supplement: supp_jit802_jit802supp.pdf [file supp_jit802_jit802supp.pdf]

## Supplementary Information

### Supplementary Methods

#### RT- PCR, PCR

Total RNA (1µg) was converted into cDNA using the reverse transcription system kit (Promega), in a reaction containing: 500ng of oligonucleotide A (T<sub>15</sub>V), 1mM deoxynucleotriphosphates, 5mM MgCl<sub>2</sub>, 10mM Tris pH8.8, 50mM KCl, 0.1%Triton X-100, 18 units of Avian Myeloblastosis virus reverse transcriptase and 10 units of RNasin ribonuclease inhibitor. Each reaction was incubated at 42°C for two hours, then cDNA were diluted to 80µl adding to the reaction 60µl of deionized H<sub>2</sub>O. Polymerase chain reactions were performed using 5µl of cDNA as template and then adding: 500nM each of forward and reverse primer, 0.2mM dNTPs, 2mM MgCl<sub>2</sub>, 10mM Tris pH8.8, 50mM KCl, 0.1%Triton X-100 and 1 unit of AmpliTaq Gold (Applied Biosystems). The following primers were used for the Vγ2 (Vγ9 according to the IMGT nomenclature) chain: oligo Vγ2 (5'ATC AAC GCT GGC AGT CC 3'); oligo Cγ1 (5'GTT GCT CTT CTT TTC TTG CC 3'). For the Vδ1 chain we used: oligo Vδ1 (5' TTA ACC ATT TCA GCC TTA CAG C 3') and oligo Cδ-1 (5' TGG CAG TCA AGA GAA AAT TG 3'). PCR were run with the following profile: denaturation: 1 min at 94°C; 5 min at 68°C; 45 cycles (45s at 94°C, 1 min at 60°C, 1 min at 72°C); extension: 10min at 72°C. PCR products were separated on 1.5% agarose/Tris-acetate-EDTA buffer gels containing 0.5µg/ml ethidium bromide (Sigma).

#### Run-off reaction.

Primer extension reactions were performed as described [37]. Each reaction contained 2 µl of PCR product, 3 mM MgCl<sub>2</sub>, 0,2 mM dNTP, 0.1 mM of 6-carboxyfluorescein (6-FAM) labeled primer (Cg-6:

5'-6-FAM-AAT AGT GGG CTT GGG GGA AAC-3'; Jg1.2: 5'-6-FAM-; Cd:5'-6-FAM-ACG GAT GGT TTG GTA TGA GG-3'), approximately 0.2 units of Taq DNA polymerase (Promega), 10 mM Tris pH8.8, and 50 mM KCl. Run-off products (4  $\mu$ l) were diluted with deionized formamide (6  $\mu$ l), and 0.7  $\mu$ l of GeneScan-500 ROX size standard (Applied Biosystems) were added to each sample. After a denaturation step (5 min at 95°C followed by immediate quenching on ice) products were loaded on a 3130 genetic analyzer (Applied Biosystems) and run on a performance-optimized polymer (POP-7).

### Sequencing

PCR products for the V $\gamma$ 2 chain were purified by gel extraction, using QIAquick gel extraction kits (Qiagen, Valencia, CA) according to the manufacturer's instructions. Purified products were denatured (1 minute at 94°C), then incubated for 30 minutes at 72°C with 2mM MgCl<sub>2</sub>, 0.2mM dATPs, and 2.5 units of Amplitaq gold (Promega, Madison, WI), then ligated into a pCR2.1 vector (Invitrogen, Carlsbad, CA). Ligated vectors were transfected into TOP 10F' competent cells (TA cloning kit, Invitrogen, Carlsbad, CA), and bacterial colonies representing a library of V $\gamma$ 2 chain sequences were grown overnight on agar plates containing 50 $\mu$ g/ml ampicillin, 500  $\mu$ M IPTG and 80  $\mu$ g/ml X-Gal (Promega, Madison, WI). Colonies containing recombinant plasmids were cultured overnight in LB media and bacterial suspensions were used as template to amplify the V $\gamma$ 2 chain inserted in the plasmid. M13 polymerase chain reactions were performed using: 2  $\mu$ l of bacterial suspension as template, 100 nM of M13 forward (5' GTA AAA CGA CGG CCA G 3') and M13 reverse primer (5' CAG GAA ACA GCT ATG AC 3'), 0.2 mM dNTPs, 2 mM MgCl<sub>2</sub>, 10 mM Tris pH 8.8, 50 mM KCl, 0.1% Triton X-100 and 1 unit of AmpliTaq Gold (Promega, Madison, WI). PCR were run with the following profile: denaturation: 1 min at 94°C; 25 cycles (45 s at 94°C, 1 min at 60°C, 1 min at 72°C); extension: 10 min at 72°C. PCR products were purified by size exclusion, after running through a bed of Sephacryl S400

(GE Healthcare, Uppsala, Sweden) packed (200  $\mu$ l/well) into 96 well MultiScreen HTS filtration plates (Millipore, Billerica, MA). Sequencing reactions were performed with a Big Dye v3.1 fluorescent sequencing kit (Applied Biosystems, Foster City, CA), and M13F or M13R oligonucleotide primers for each sample. Sequencing reactions were run with the following profile: denaturation: 1 min at 94°C; 25 cycles (30 s at 96°C, 20 s at 50°C, 4 min at 60°C). Sequences were loaded on an automated sequencer ABI3700 and analyzed using Sequencher and MacClade softwares.

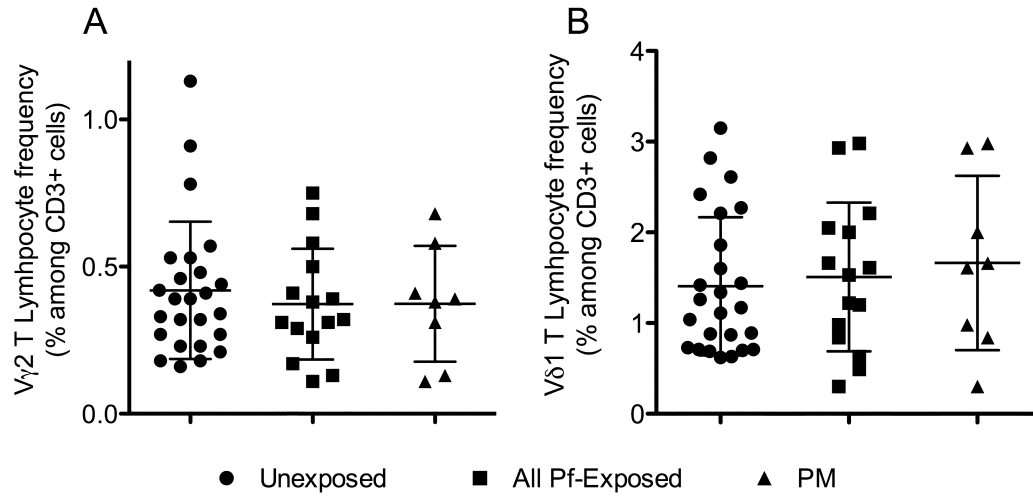

Supplementary Figure S1

**Supplementary Figure 1.** Prenatal exposure to *Pf* did not affect the levels of  $\gamma\delta$  T cell populations in cord blood. The frequency of A) V $\gamma$ 2+ lymphocytes (V $\gamma$ 9 according to IMGT nomenclature) and B) V $\delta$ 1+ lymphocytes was analyzed by flow-cytometry in freshly isolated CBMC and reported as fraction of CD3+ cells. The scatter plots show individual values, means and standard deviations for Unexposed, All *Pf*-exposed and PM neonates.

Supplementary Table 1. V $\gamma$ 2V $\delta$ 2 T cell phenotype 14 days after ALN stimulation.

|                   | Unexposed (N=16)             | Pf-Exposed (N=15)            |
|-------------------|------------------------------|------------------------------|
| CD56              | 39.3 $\pm$ 14.0 (20.6-68)    | 34.1 $\pm$ 18.9 (7.2-80)     |
| NKG2A             | 19.2 $\pm$ 12.2 (5.5-51.4)   | 15.3 $\pm$ 7.8 (4.3-33.3)    |
| NKG2D             | 73.5 $\pm$ 14.6 (50.8-92.7)  | 66.2 $\pm$ 18.1 (18-91.2)    |
| CD25 <sup>a</sup> | 220.2 $\pm$ 137.3 (50.1-445) | 240.2 $\pm$ 190.9 (52.9-607) |
| CD45RA-CD27+      | 70.5 $\pm$ 17.8 (27.1-89.8)  | 69.8 $\pm$ 15.3 (30-89.2)    |
| CD45RA-CD27-      | 18.1 $\pm$ 14.4 (1.6-53.4)   | 19.5 $\pm$ 14.4 (1.4-62.7)   |

Means  $\pm$  Standard deviations (range) are shown for each group. Values (with the exception of the CD25 row) represent the percentages of V $\delta$ 2 T cells displaying a certain phenotype.

<sup>a</sup> Mean Fluorescence Intensity
